# Supplementary material
Source: publisher figshare collection journal article supplement (https://karger.figshare.com/ndownloader/files/11050373)
Supplement: Supplementary file 1 [file 11050373]

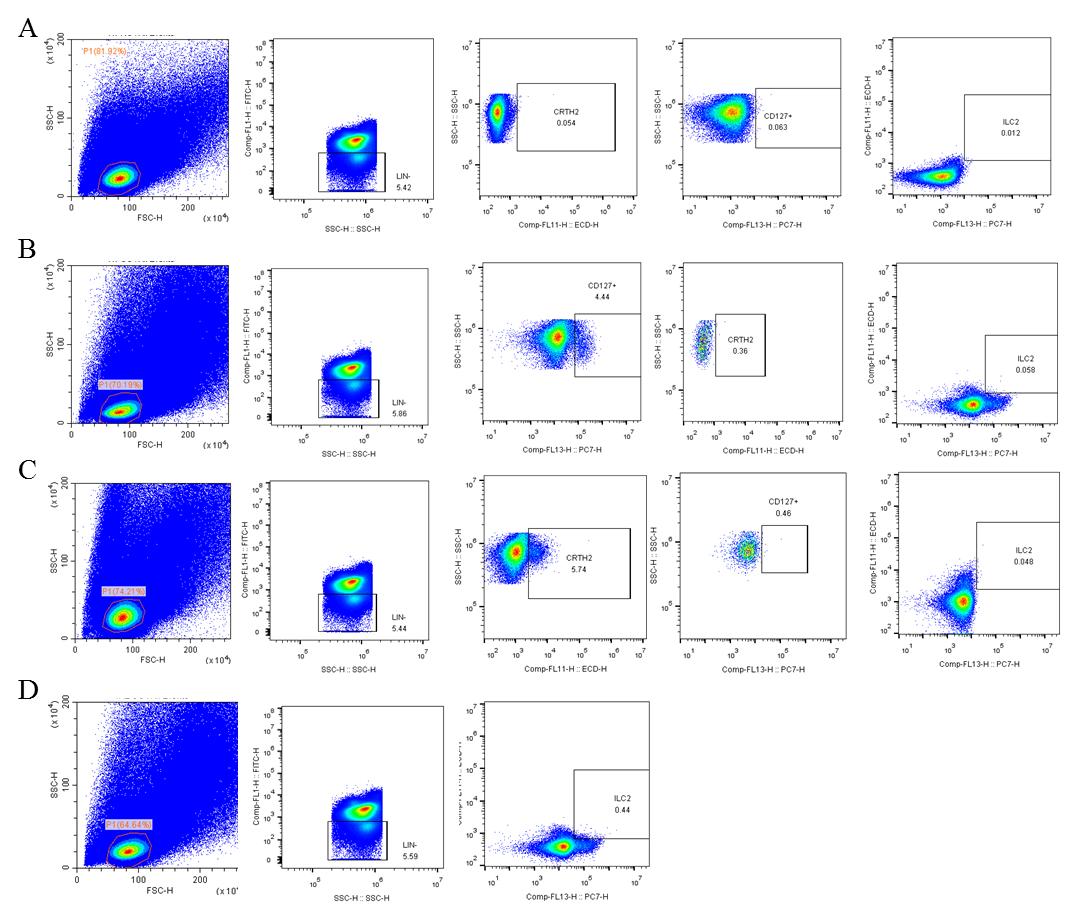


**Fig S1.** FMO flow cytometry diagrams showing the identifies of different sub-cellular groups. A, Lin- stained only PBMCs showing the identity of Lin- cells in PBMCs; B, Lin- and CD127 stained PBMCs that taken as unstained control for CRTH2 staining; C, Lin- and CRTH2 stained PBMCs that taken as unstained control for CD127 staining; D, Lin- CD127 and CRTH2 stained PBMCs that showing the ILC2s in PBMCs.


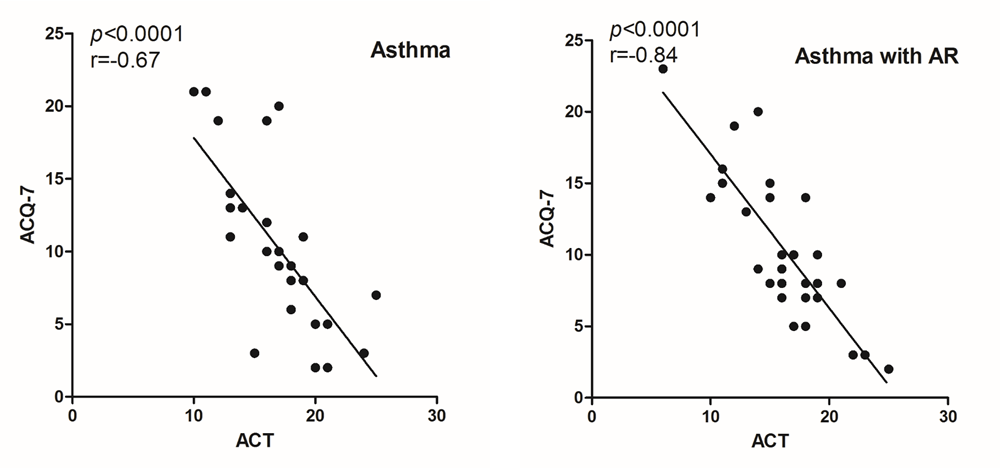


**Fig S2.** The correlation between ACT and ACQ-7 scores in both asthma and asthma with AR patients.
